# Supplementary material
Source: PubMed Central journal article supplement (PMC3220478)
Supplement: supp_M111.284448_jbc.M111.284448-1.pdf [file supp_M111.284448_jbc.M111.284448-1.pdf]

(A) 115-7c does not alter Rnq1-YFP localization into puncta

(B) 115-7c does not cure [RNQ1]+

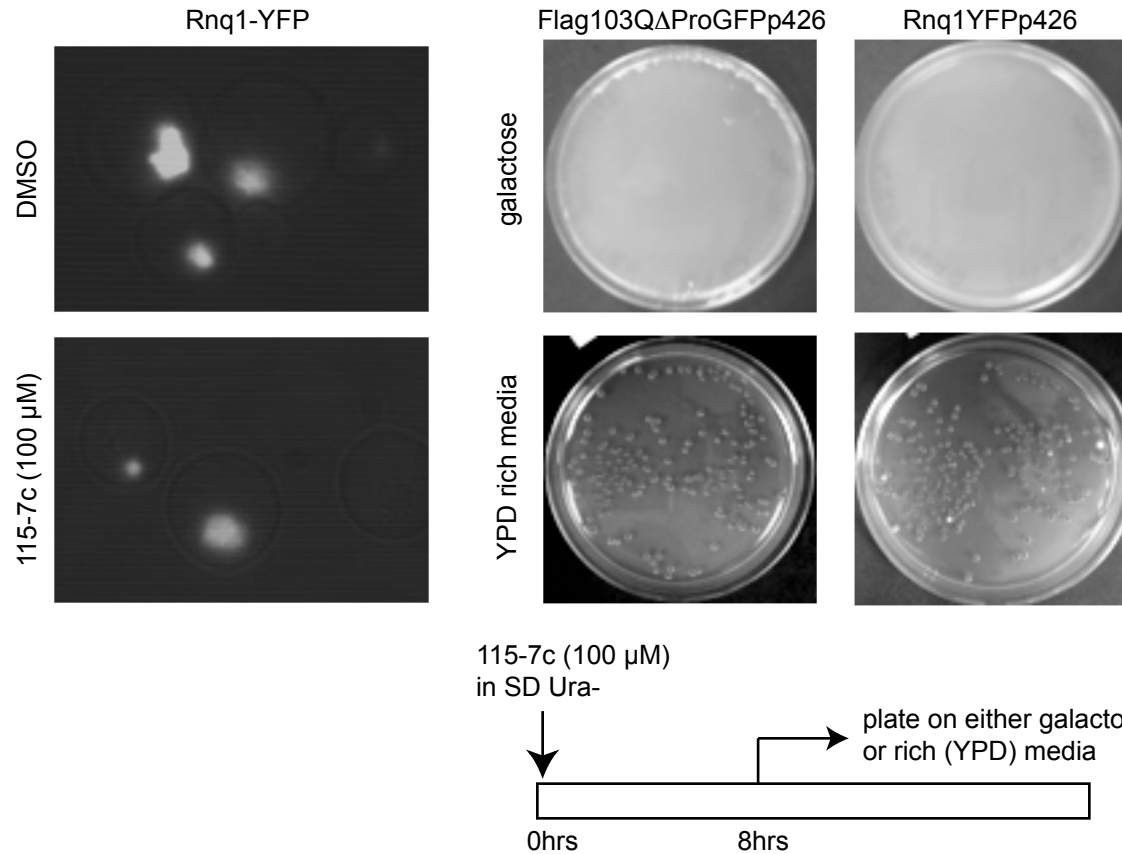

**Supplemental Fig 1.** The compound 115-7c does not impact [RNQ1]<sup>+</sup> status. (A) Rnq1-YFP cells were treated with 115-7c (100 μM) for 24 hrs at 30 °C and the capacity of the prion to form aggregates was assessed by fluorescence microscopy. (B) Yeast (W303) harboring the indicated plasmid were incubated at 30 °C for 8 hours with 115-7c (100 μM), as indicated by the schematic. We found that 115-7c did not block toxicity of either a toxic polyQ construct or by over-expression of Rnq1-YFP. Together, these results suggest that 115-7c has no effect on Rnq prion status.
